# Supplementary material for: Plant hairy roots enable high throughput identification of antimicrobials against Candidatus Liberibacter spp
Source: PubMed Central journal article supplement (PMC7669877; doi:10.1038/s41467-020-19631-x), 2020-11-16
Supplement: 41467_2020_19631_MOESM1_ESM.pdf [file 41467_2020_19631_MOESM1_ESM.pdf]

**Plant hairy roots enable high throughput identification of antimicrobials  
against *Candidatus Liberibacter* spp.**

Irigoyen *et al.*

**Supplementary Table 1. Primers used in this study.**

| <b>Primer name</b>      | <b>Sequence (5'-3')</b>              | <b>Reference</b> |
|-------------------------|--------------------------------------|------------------|
| <i>AtNPR1-F</i>         | CCGAATTCGTATGGACACCACCATTGATGGA      | Current study    |
| <i>AtNPR1-R</i>         | CCGGATCCGTTACCCGACGACGATGAGAGA       | Current study    |
| <i>SINPR1-F</i>         | CCGAATTCGTATGGATAGTAGAACTGCTTTTTCCGG | Current study    |
| <i>SINPR1-R</i>         | CCGGATCCGTCTATTTCTAAATGGGAGATTATTG   | Current study    |
| <i>StNPR3-G1-F</i>      | ATTGGTCGTTGAGGGGATTGATGT             | Current study    |
| <i>StNPR3-G1-R</i>      | AAACACATCAATCCCCTCAACGAC             | Current study    |
| <i>StNPR3-F</i>         | TTTGAACAATGGAGAGCGGC                 | Current study    |
| <i>StNPR3-R</i>         | TAATTAATGGCAGGGCGGCA                 | Current study    |
| TEV5'-F                 | ACGAATCTCAAGCAATCAAGC                | Current study    |
| TEV3'-R                 | CTCACTTTGTCGTTTCGCTA                 | Current study    |
| SSR-F                   | TTATTTTGAGATGGTTTGTAAATG             | 1                |
| SSR-R                   | TATTATCATTCTATTGCCTATTTTCG           | 1                |
| <i>SIRPL2-F</i>         | GAGGGCGTACTGAGAAACCA                 | 2                |
| <i>SIRPL2-R</i>         | CTTTTGTCCAGGAGGTGCAT                 | 2                |
| <i>StRPL2-F</i>         | GTGGAGGACGAACTGAGAAA                 | Current study    |
| <i>StRPL2-R</i>         | AGTCCTCCTTGCAGCAATAA                 | Current study    |
| <i>CsiGAPC2-F</i>       | GAGGAGATCCCATGGGCAAA                 | 3                |
| <i>CsiGAPC2-R</i>       | AAGAGGAGCTAGGCAGTTGG                 | 3                |
| OA2-F                   | GCGCTTATTTTTAATAGGAGCGGCA            | 4                |
| OI2c-R                  | GCCTCGCGACTTCGCAACCCAT               | 4                |
| Lso-F (qPCR)            | CGAGCGCTTATTTTTAATAGGAGC             | 5                |
| HLB-R (qPCR)            | GCGTTATCCCGTAGAAAAAGGTAG             | 5                |
| A2-F                    | TATAAAGGTTGACCTTTCGAGTTT             | 6                |
| J5-R                    | ACAAAAGCAGAAATAGCACGAACAA            | 6                |
| RNR-F (qPCR)            | CATGCTCCATGAAGCTACCC                 | 7                |
| RNR-R (qPCR)            | GGAGCATTTAACCCACGAA                  | 7                |
| RolB-F                  | GCTCTTGCAAGTGTAGAT                   | 8                |
| RolB-R                  | GAAGGTGCAAGCTACCTCC                  | 8                |
| RolC-F                  | CTCCTGACATCAAACCTCG                  | 8                |
| RolC-R                  | TGCTTCGAGTTATGGGTA                   | 8                |
| mGFP-F                  | CTCTTTCTCATCTTTTCACTTCTCC            | Current study    |
| mGFP-R                  | GGACAGGTAATGGTTGTCTGGT               | Current study    |
| <i>StPRI-F</i> (qPCR)   | CTGGTGCTGTGAAGATGTGG                 | Current study    |
| <i>StPRI-R</i> (qPCR)   | ACAACCAAGACGTACCGAGT                 | Current study    |
| <i>StPR3-F</i> (qPCR)   | GCAAATTCGGCTGGTGTGGTA                | Current study    |
| <i>StPR3-R</i> (qPCR)   | CTGGAGAACCGCCAGGACAC                 | Current study    |
| <i>StWRKY1-F</i> (qPCR) | GGCGAAAGGCAATCCATGTC                 | Current study    |
| <i>StWRKY1-R</i> (qPCR) | TTGTCCGATCCTCAGCACAC                 | Current study    |
| <i>StNPR1-F</i> (qPCR)  | GCCGATGATCTGCCCATGAA                 | Current study    |
| <i>StNPR1-R</i> (qPCR)  | GGTTCTTTGGCCTTGATTGGT                | Current study    |

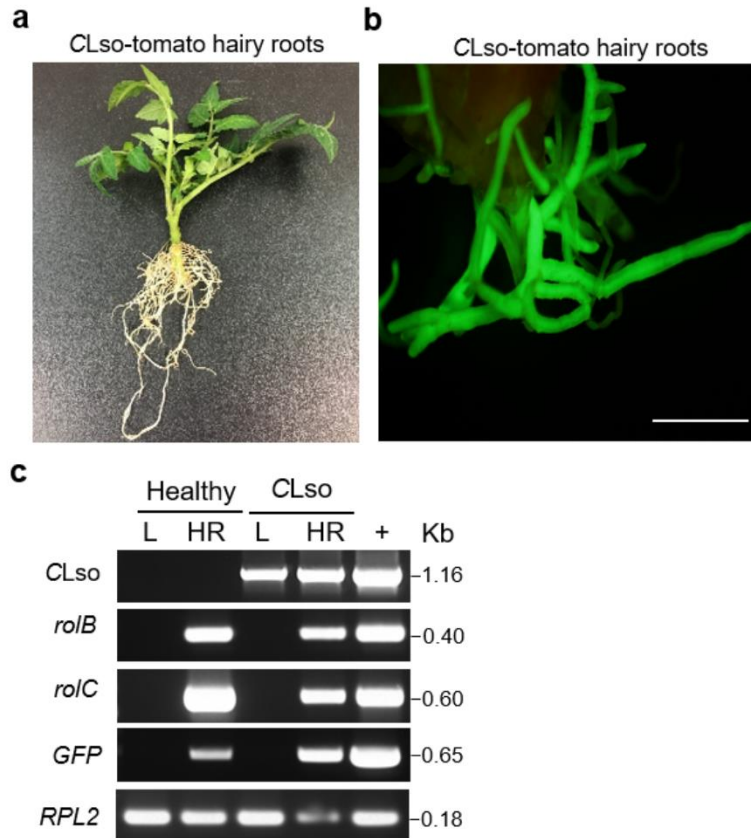

**Supplementary Fig. 1. *Candidatus Liberibacter solanacearum* in tomato hairy roots. a,**

Hairy root production using *Candidatus Liberibacter solanacearum* (CLso)-infected tomato

explants. **b,** Visual confirmation of GFP expression in hairy roots by fluorescence microscopy.

Scale bar, 1 cm. **c,** Detection of CLso in hairy roots by PCR amplification of diagnostic markers

specific to CLso (16S rDNA). *GFP*, *rolB* and *rolC*, encoded on the Ti and Ri plasmids

respectively, and co-transformed into the hairy roots, were used as additional markers for hairy

root authenticity; *RPL2* is an endogenous tomato gene, used as genomic DNA control for PCR.

‘L’ and ‘HR’ indicate leaf and hairy root sample, respectively. ‘+’ indicates a positive control

used for the respective PCR amplifications. The experiment was independently repeated two

times, and all attempts of replication were successful. Uncropped raw agarose gel images used to

prepare Supplementary Fig. 1c are presented in Supplementary Fig. 11.

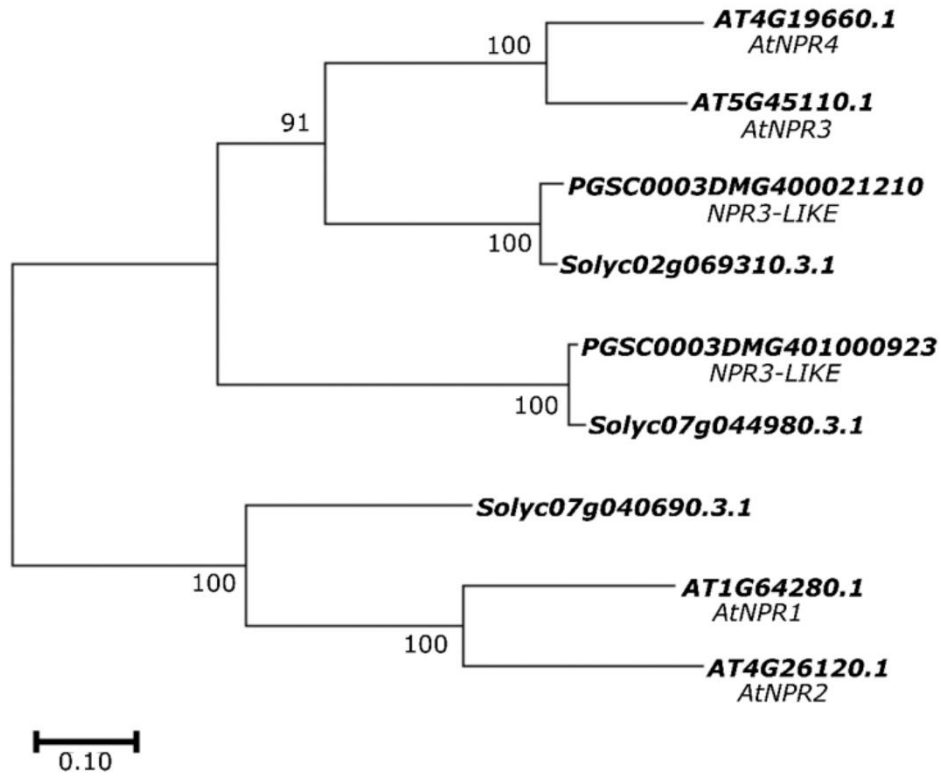

**Supplementary Fig. 2. Phylogenetic analysis of the Arabidopsis, tomato, and potato *Non-expressor of Pathogenesis Related (NPR)* gene families.** Phylogenetic tree inferred by the maximum-likelihood method using amino acid sequences of NPR-related members from Arabidopsis, potato, and tomato. The tree is drawn to scale, with branch lengths measuring the number of substitutions per site. Bootstrap values are indicated by the numbers at the branch points.

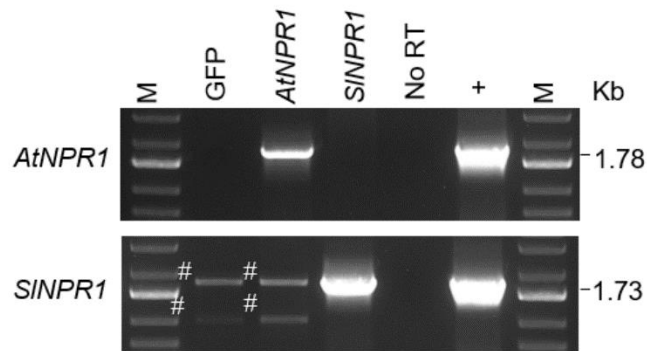

**Supplementary Fig. 3. Confirmation of *NPR1* expression in CLso-potato hairy roots.**

Hashtags (#) indicate the amplification of a putative endogenous potato *NPR1*, which was amplified in both control (GFP) and *AtNPR1*-transformed potato hairy roots. '+' indicates a positive control used for the respective PCR amplifications. 'M' indicates DNA molecular marker. Uncropped raw agarose gel images used to prepare Supplementary Fig. 3 are presented in Supplementary Fig. 11.

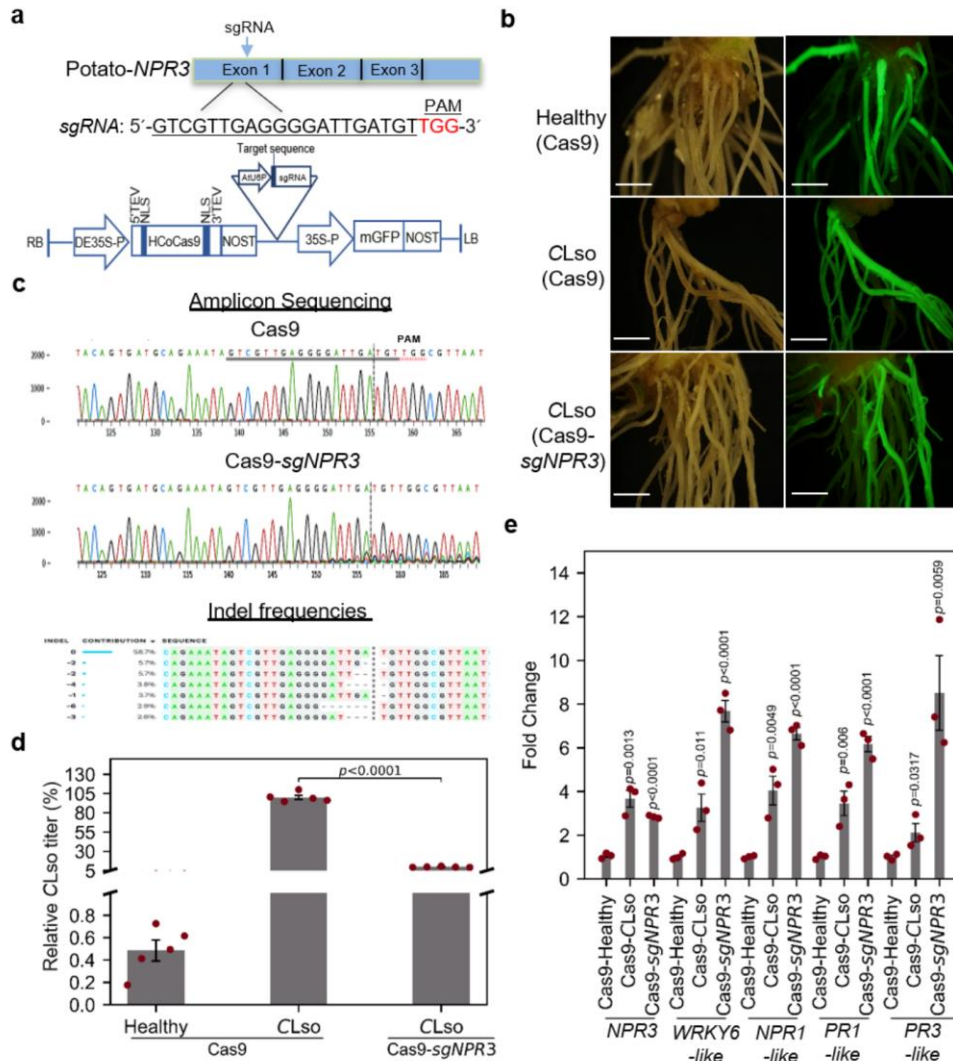

**Supplementary Fig. 4. Genome editing of *StNPR3* in potato hairy roots confers tolerance to *Candidatus Liberibacter* spp.** (a) Schematic of CRISPR-Cas9 construct with the potato *NPR3* sgRNA and GFP marker cassette (included to serve as a visual marker for construct integration in the hairy roots). (b) Transformation with Cas9 alone (control) and Cas9-sg*NPR3* targeting potato *NPR3* in healthy and ‘*Candidatus Liberibacter solanacearum*’ (CLso)-infected hairy roots. Scale bar, 1 cm. (c) Amplicon sequencing confirming gene editing in the target DNA (*StNPR3*), as indicated by presence of indels in the Cas9-sg*NPR3* hairy roots, but not in Cas9 alone. (d) Quantification of CLso in edited hairy roots. Error bars represent  $\pm$  standard error of mean (n=5).  $p$ -values were calculated by two-sample  $t$ -test (one-tailed) relative to Cas9-CLso samples. The experiment was independently repeated two times, and all attempts of replication were successful. (e) Relative expression of the genes *WRKY6-like*, *NPR1-like*, *PR1-like* and *PR3-like* in *StNPR3*-edited hairy roots. Error bars represent  $\pm$  standard error of mean (n=3).  $p$ -values were calculated by two-sample  $t$ -test (one-tailed) relative to Cas9-Healthy samples. Source data underlying Supplementary Figure 4d and 4e are provided as a Source Data file.

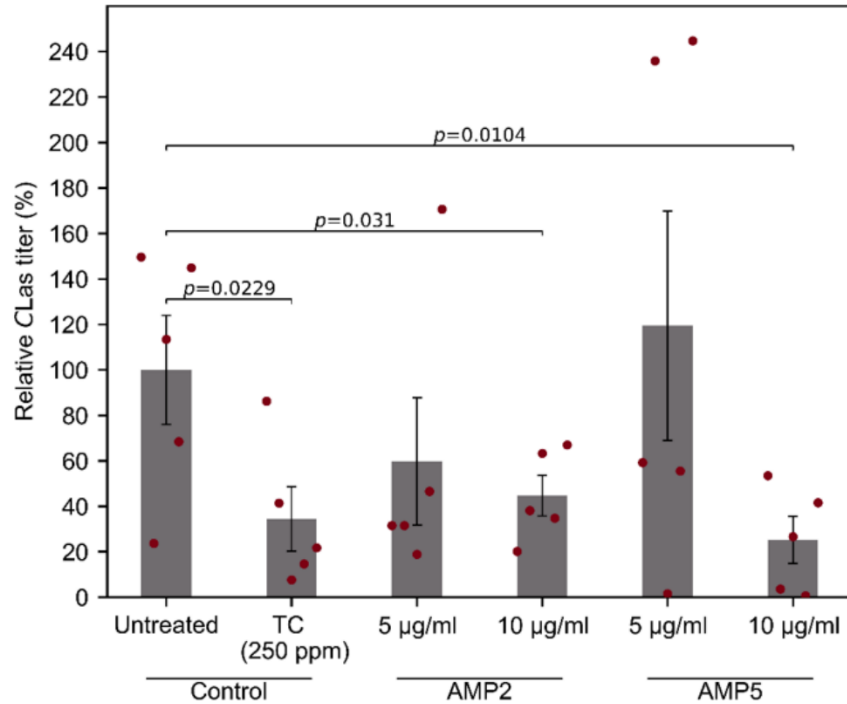

**Supplementary Fig. 5. Efficacy testing of antimicrobial peptides AMP2 and AMP5 by direct infiltration in microbial hairy roots.** Relative CLas titers were calculated from five biological replicates. Untreated and tetracycline-treated (TC, 250 ppm) hairy roots were used as negative and positive controls. Error bars represent  $\pm$  standard error of mean (n=5). *p*-values were calculated by two-sample *t*-test (one-tailed) relative to untreated samples. Source data are provided as a Source Data file.

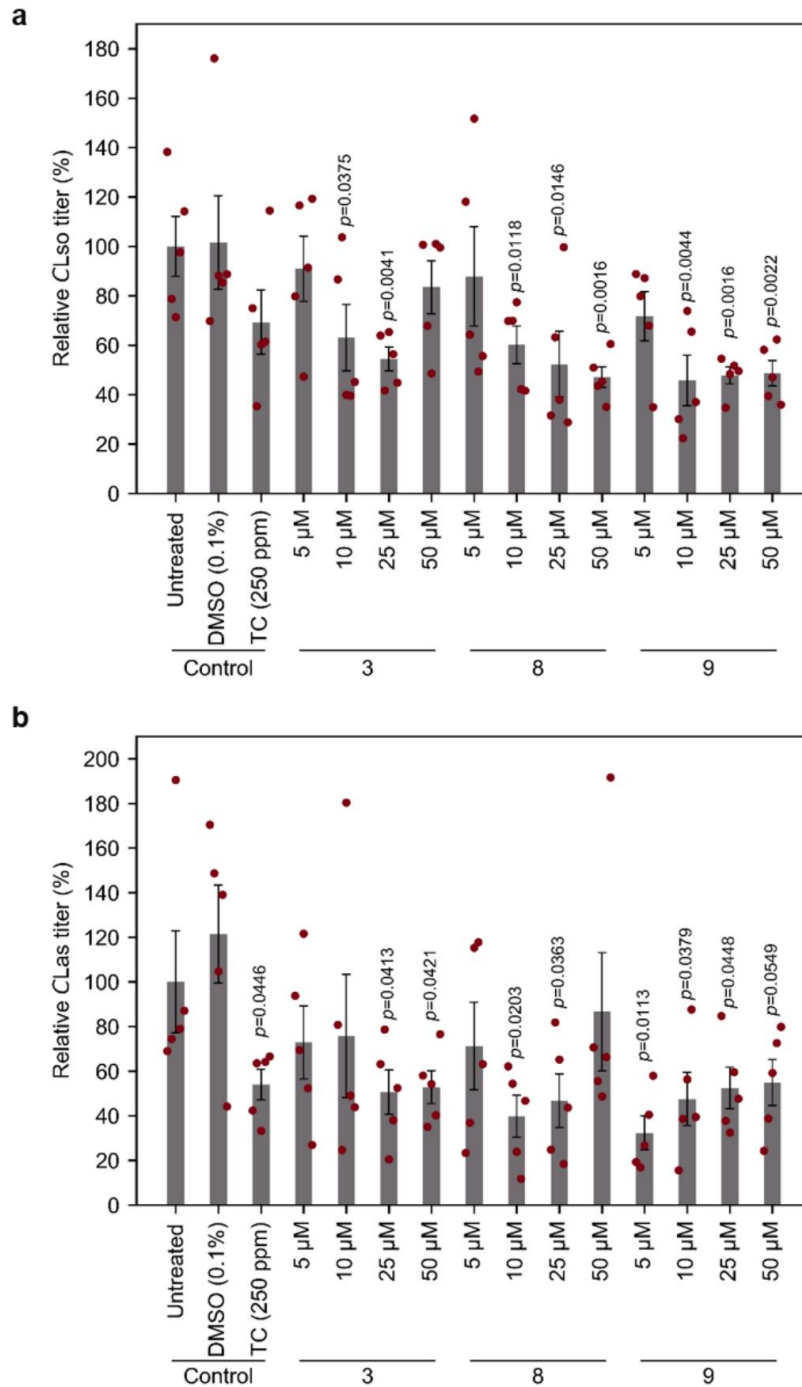

**Supplementary Fig. 6. Dose-response inhibition assays of three selected compounds in CLso-potato and CLas-citrus hairy roots.** Dose-response inhibition assays of three selected compounds in CLso-potato and CLas-citrus hairy roots. Relative CLas (a) and CLso (b) titers were calculated from five biological replicates. Untreated, DMSO (0.1%) and tetracycline (TC, 250 ppm) were used as negative and positive controls. Error bars represent  $\pm$  standard error of mean (n=5). *p* values were calculated by two-sample *t*-test (one-tailed) relative to untreated samples. Source data are provided as a Source Data file.



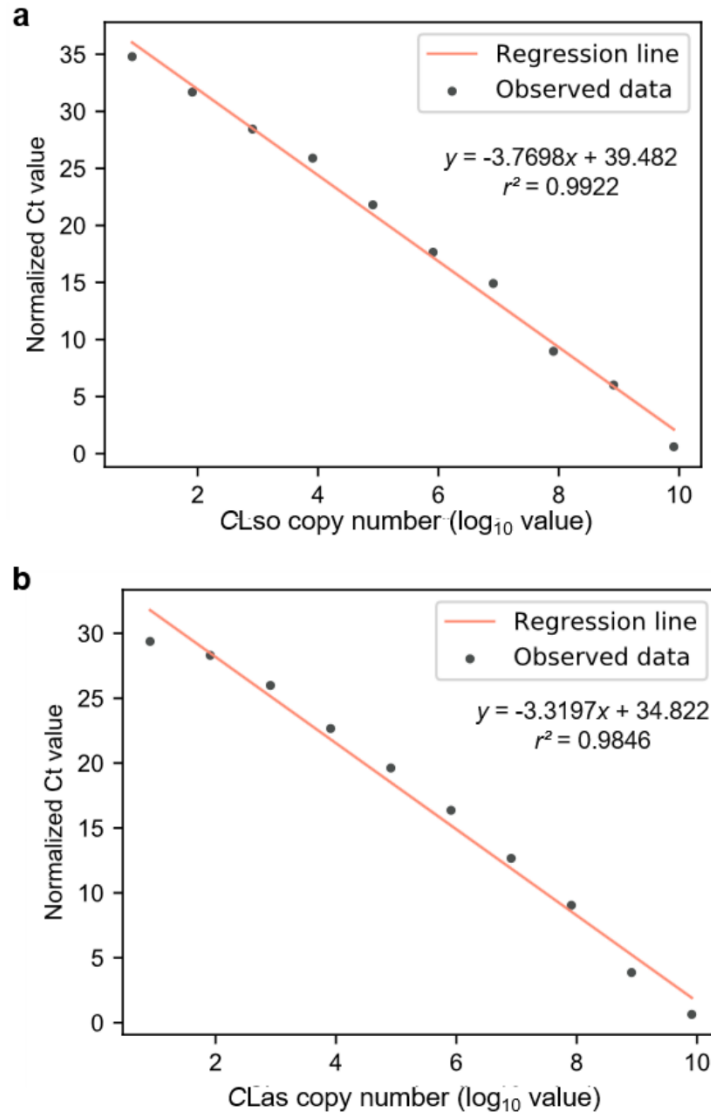

**Supplementary Fig. 7. Standard curves and regression analysis to establish relationship between Ct and CLso or CLas copy number.** Two separate standards curves were established for quantification of CLso copy number in potato (**a**) and CLas copy number in citrus (**b**). A plasmid containing the CLso and CLas target amplicons corresponding to the 16S rRNA gene and *nrdB* gene was synthesized and spiked into 50 ng of genomic DNA extracted from the respective hairy root tissues in 10-fold dilutions yielding  $8.17 \times 10^9$  to  $8.17 \times 10^0$  copies in each sample. Samples were subjected to qPCR to determine the target Ct value, and the data presented are the average normalized Ct of three replicates. The estimated correlation coefficient ( $r^2$ ) was 0.99 and 0.98 for CLso and CLas, respectively suggesting good linear range of the data. The above listed regression equations were used to calculate CLso and CLas copy number and genome equivalents in other samples as described in Methods. Source data are provided as a Source Data file.

**a** >CLas (Primer specific to CLas ribosomal protein L1, *rplA* gene)

CCNTGACTACTCTTGTAGTTGTTTTTGTGTGGATTCCTTTTTCGCTATCGGATCGCTTCTTTTTTGTAAAGGA  
 TGCGTTAGGATTTTTGTCTTCTTCGAAATCAAGATATGAAAATATTTTCTTGGTATAGATATAGGAAAAGGAATG  
 GGTATATTTGTCATCTGGAGATGAAAGTTGAATAGACAAGGAAAGAGCGTAGAAATTTCTGAATTAAGTAAGATTT  
 TTTCTTCTTCTGGATCAATTGTTGTTGCACATTATAAGGGAATTAGTGTTCGCAAAATTAAGATCTTCGGAAAAA  
 GATGCGGGAAGCTGGTGGAGGTGTAAGTTGCCAAAAATCGTCTCGTCAAGATTGCTATCCGTGATACTAGTATT  
 AGAGGAATATCTGATCTTTTCGTTGGGCAGTCTCTAATTGTCTATTCCGATAGTCTGTATTGCTCCTAAAATTT  
 CGGTTAGCTTTCAAATGACAATAATGAATTTAGAGTTCTTGGTGGGTTGTAGAGAAGGGCGTCTTAATCAAGA  
 TTCTATCAAGCAAATTGCTTCTTACCCGATCTTGAGGGTATTCGAGCTGGTATCATAAGTGTATCCAATCTAAT  
 GCGACTACATTTGGTTAGACTTCTTGGTACGCGTCAGACTCAAATTGTTCTTGGCGTTCCCGCACCACTTTGCCTC  
 AGCTCAGAAGTGACGATTAATAATCTTACTTACG

Sequences producing significant alignments Download Manage Columns Show 100

select all 100 sequences selected GenBank Graphics Distance tree of results

| Description                                                                                                                                                                                     | Max Score | Total Score | Query Cover | E value | Per. Ident | Accession  |
|-------------------------------------------------------------------------------------------------------------------------------------------------------------------------------------------------|-----------|-------------|-------------|---------|------------|------------|
| <input checked="" type="checkbox"/> Candidatus <i>Liberbacter asiaticus</i> strain A4, complete genome                                                                                          | 1175      | 1175        | 90%         | 0.0     | 99.08%     | CPD10804.2 |
| <input checked="" type="checkbox"/> Candidatus <i>Liberbacter asiaticus</i> isolate Gondar_GNDGJ ribosomal protein L1 (rplA) and ribosomal protein L10 (rplJ) genes, partial cds                | 1175      | 1175        | 90%         | 0.0     | 99.08%     | MK542517.1 |
| <input checked="" type="checkbox"/> Candidatus <i>Liberbacter asiaticus</i> isolate Dangila_TE_72 ribosomal protein L1 (rplA) and ribosomal protein L10 (rplJ) genes, partial cds               | 1175      | 1175        | 90%         | 0.0     | 99.08%     | MH809485.1 |
| <input checked="" type="checkbox"/> Candidatus <i>Liberbacter asiaticus</i> isolate K5 50S ribosomal subunit protein L1 (rplA) and 50S ribosomal subunit protein L10 (rplJ) genes, partial cds  | 1175      | 1175        | 90%         | 0.0     | 99.08%     | MF694639.1 |
| <input checked="" type="checkbox"/> Candidatus <i>Liberbacter asiaticus</i> isolate MG 50S ribosomal subunit protein L1 (rplA) and 50S ribosomal subunit protein L10 (rplJ) genes, partial cds  | 1175      | 1175        | 90%         | 0.0     | 99.08%     | MF769717.1 |
| <input checked="" type="checkbox"/> Candidatus <i>Liberbacter asiaticus</i> isolate B1 50S ribosomal subunit protein L1 (rplA) and 50S ribosomal subunit protein L10 genes, partial cds         | 1175      | 1175        | 90%         | 0.0     | 99.08%     | MF769716.1 |
| <input checked="" type="checkbox"/> Candidatus <i>Liberbacter asiaticus</i> isolate AK4 50S ribosomal subunit protein L1 (rplA) and 50S ribosomal subunit protein L10 (rplJ) genes, partial cds | 1175      | 1175        | 90%         | 0.0     | 99.08%     | MF769715.1 |
| <input checked="" type="checkbox"/> Candidatus <i>Liberbacter asiaticus</i> isolate AK9 50S ribosomal subunit protein L1 (rplA) and 50S ribosomal subunit protein L10 (rplJ) genes, partial cds | 1175      | 1175        | 90%         | 0.0     | 99.08%     | MF769714.1 |
| <input checked="" type="checkbox"/> Candidatus <i>Liberbacter asiaticus</i> isolate SK16 50S ribosomal subunit protein L1 (rplA) and 50S ribosomal subunit protein L10 genes, partial cds       | 1175      | 1175        | 90%         | 0.0     | 99.08%     | MF769713.1 |

**b** >CLso (Primer specific to CLso 16S ribosomal rRNA gene)

NNGCCCTGTAGCCGTGTGTAGCCCAGCCCATAGGGCCATGAGGACTTGACGTATCCCCACCTTCCCTCCGATTAT  
 CACCGCAGTCCCTATAAAGTACCCAACATCTAGATAAAATCTAAACTTGATGGCAACTAGAGGTAGGGGTTGCGCT  
 CGTTGCGGGACTTAACCCAACATCTCAGCACAGAGCTGACGACAGCCATGCAGCACCTGTATAAAGGTCTCCGAAA  
 AGAAAATACCATCTCTGATATCGTCTCTATATGTCAAGGGCTGGTAAGTTCTGCGGTTGCATCGAATTAACCA  
 CATGCTCCACCGCTTGTGCGGGCCCCGTC AATTCTTTGAGTTTTAATCTTGCAGCCGACTCCCCAGGGGAGTG  
 CTTAATGCGTTAGCTGCGCCACTGAATGGTAAACCACCAACAGCTAGCCCTCATCGTTTACAGAATGGACAACAAG  
 GGTATCTAATCTGTTGCTCACCATGAATTCATAATCTTCTTTCGAAATAAAGCCAAAGCACTGCATACTCCAAT  
 GGTGTTACCAACAATACCTAAGAAATCTCAACAACATTCAGTATCAACTAAAA

Sequences producing significant alignments Download Manage Columns Show 100

select all 100 sequences selected GenBank Graphics Distance tree of results

| Description                                                                                                                           | Max Score | Total Score | Query Cover | E value | Per. Ident | Accession  |
|---------------------------------------------------------------------------------------------------------------------------------------|-----------|-------------|-------------|---------|------------|------------|
| <input checked="" type="checkbox"/> Candidatus <i>Liberbacter solanacearum</i> clone M8-C-P1 16S ribosomal RNA gene, partial sequence | 850       | 850         | 80%         | 0.0     | 98.55%     | MT036080.1 |
| <input checked="" type="checkbox"/> Candidatus <i>Liberbacter solanacearum</i> clone M7-T-P1 16S ribosomal RNA gene, partial sequence | 850       | 850         | 80%         | 0.0     | 98.55%     | MT036059.1 |
| <input checked="" type="checkbox"/> Candidatus <i>Liberbacter solanacearum</i> clone M6-T-P1 16S ribosomal RNA gene, partial sequence | 850       | 850         | 80%         | 0.0     | 98.55%     | MT036058.1 |
| <input checked="" type="checkbox"/> Candidatus <i>Liberbacter solanacearum</i> clone M5-T-im 16S ribosomal RNA gene, partial sequence | 850       | 850         | 80%         | 0.0     | 98.55%     | MN396641.1 |
| <input checked="" type="checkbox"/> Candidatus <i>Liberbacter solanacearum</i> clone M4-T-im 16S ribosomal RNA gene, partial sequence | 850       | 850         | 80%         | 0.0     | 98.55%     | MN396640.1 |
| <input checked="" type="checkbox"/> Candidatus <i>Liberbacter solanacearum</i> clone M3-T-P1 16S ribosomal RNA gene, partial sequence | 850       | 850         | 80%         | 0.0     | 98.55%     | MN396639.1 |
| <input checked="" type="checkbox"/> Candidatus <i>Liberbacter solanacearum</i> isolate AB171 16S ribosomal RNA gene, partial sequence | 850       | 850         | 80%         | 0.0     | 98.55%     | MH843709.1 |
| <input checked="" type="checkbox"/> Candidatus <i>Liberbacter solanacearum</i> isolate 1 16S ribosomal RNA gene, partial sequence     | 850       | 850         | 80%         | 0.0     | 98.55%     | KX185608.1 |
| <input checked="" type="checkbox"/> Candidatus <i>Liberbacter solanacearum</i> isolate YARL1 16S ribosomal RNA gene, partial sequence | 850       | 850         | 80%         | 0.0     | 98.55%     | KJ588184.1 |
| <input checked="" type="checkbox"/> Candidatus <i>Liberbacter solanacearum</i> isolate 2 16S ribosomal RNA gene, partial sequence     | 850       | 850         | 80%         | 0.0     | 98.55%     | KX197200.1 |

**Supplementary Fig. 8. Sanger sequencing and BLAST analysis confirms the identities of (a) CLas and (b) CLso in the citrus and potato hairy roots, respectively.** The respective PCR amplicons were sequenced, and BLAST analysis was performed to determine the identity of the PCR product. The top ten hits shown are hits to corresponding CLas and CLso gene sequences.

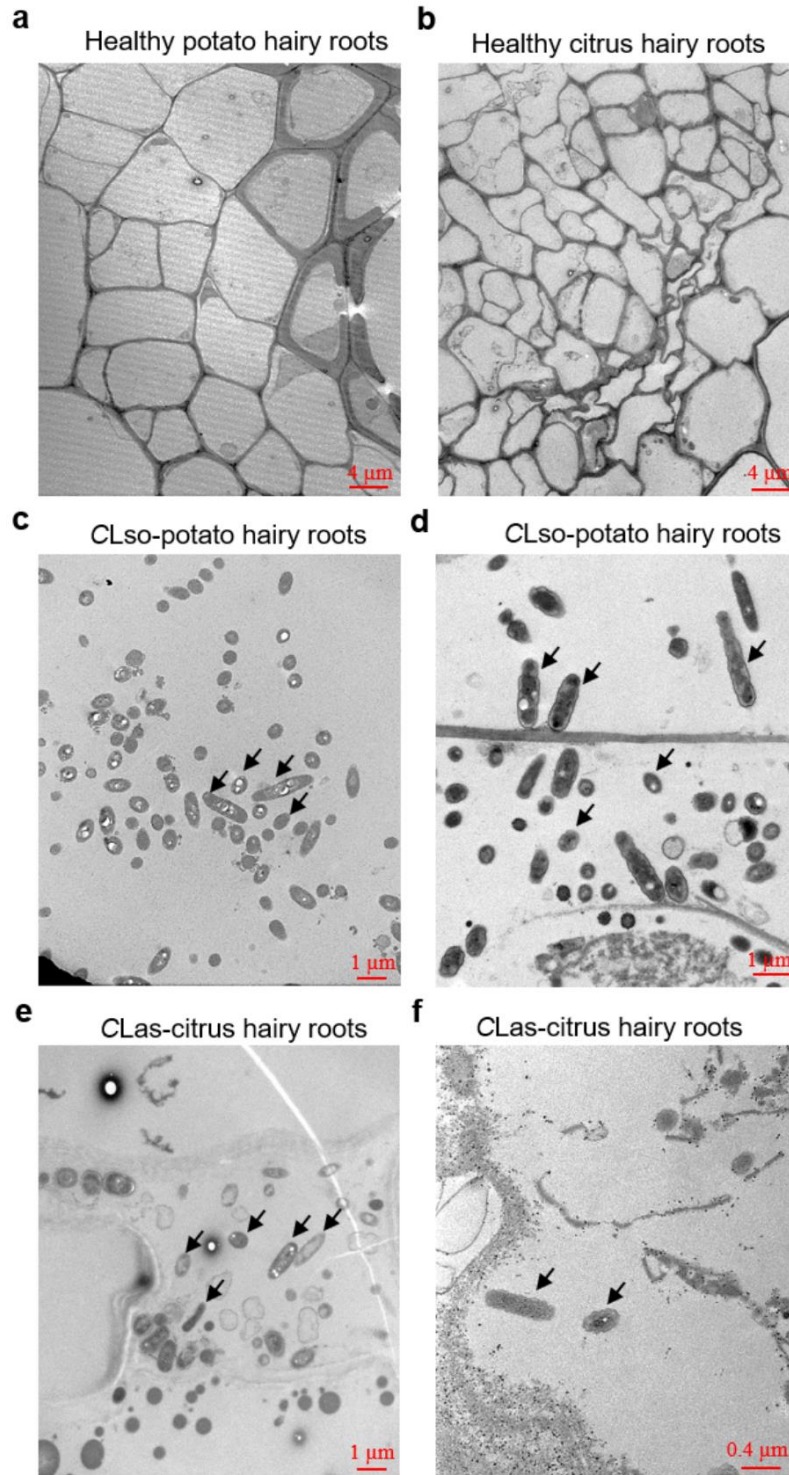

**Supplementary Fig. 9. Transmission electron microscopy imaging of CLso-potato and CLas-citrus hairy roots.** (a-b) Cross-section of healthy CLso-potato and CLas-citrus hairy roots. Scale bars, 4  $\mu\text{m}$ . (c-f) Cross-section of CLso-potato and CLas-citrus hairy roots showed multiple round- and bacilliform-shaped bacteria-like cells. Scale bars, 0.4 to 1  $\mu\text{m}$ .

**a**

Figure 1e

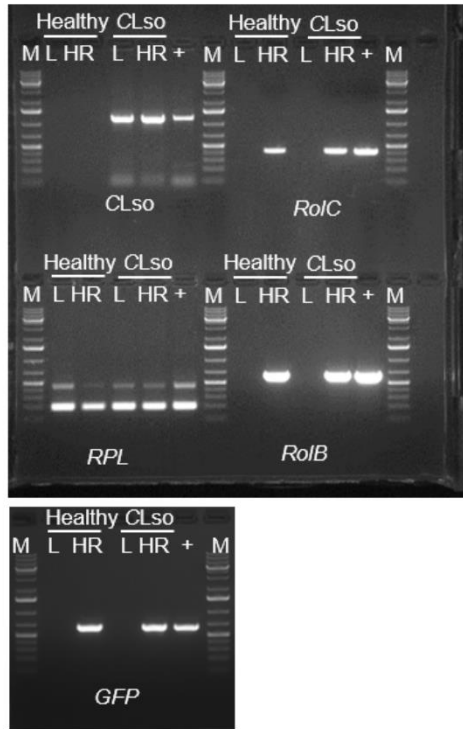**b**

Figure 1f

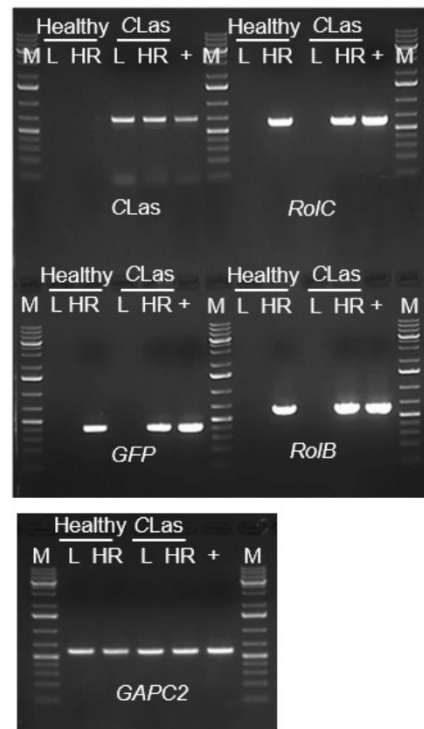

**Supplementary Fig. 10. Uncropped raw agarose gel images used to prepare Fig. 1e and 1f.**

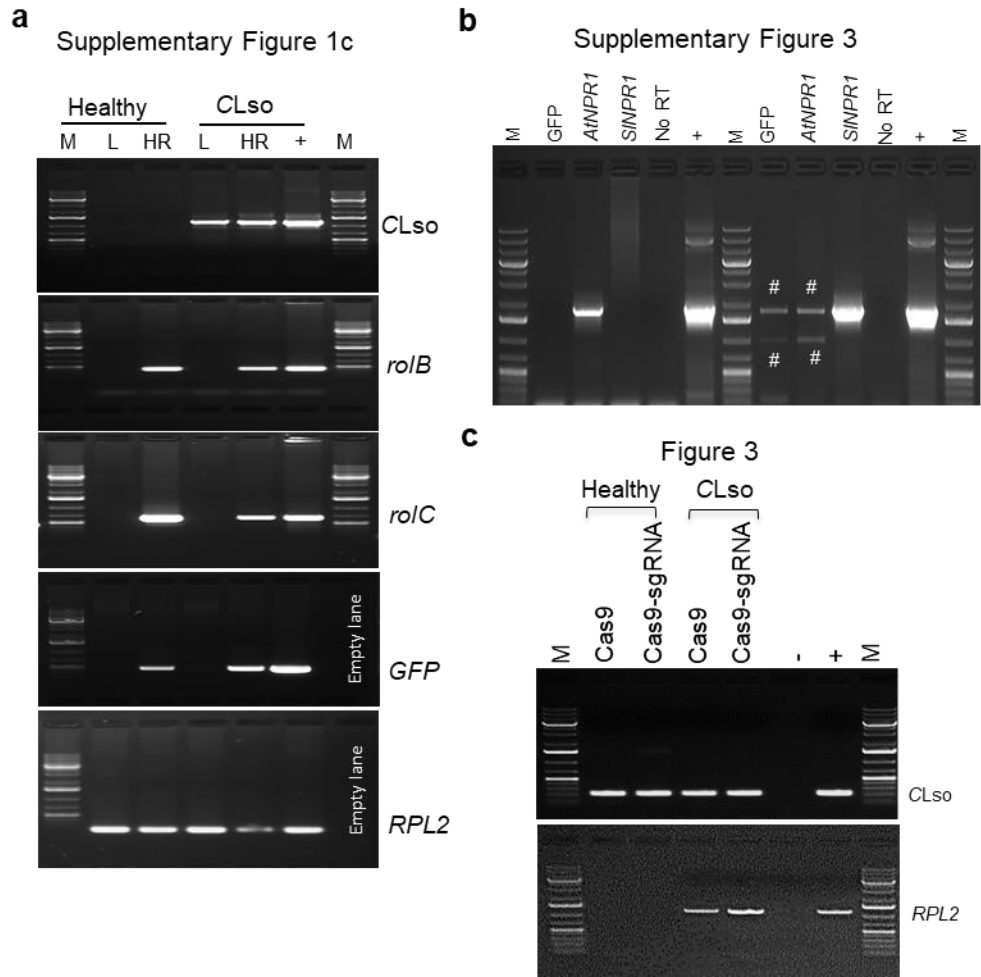

Supplementary Fig. 11. Uncropped raw agarose gel images used to prepare Supplementary Figs. 1c and 3 as well as Fig. 3.

## Supplementary References

1. Lin H, *et al.* Genetic diversity of ‘*Candidatus Liberibacter solanacearum*’ strains in the United States and Mexico revealed by simple sequence repeat markers. *Eur. J. Plant Pathol.* **132**, 297-308 (2012).
2. Avila CA, *et al.* Loss of function of *FATTY ACID DESATURASE7* in tomato enhances basal aphid resistance in a salicylate-dependent manner. *Plant Physiol.* **158**, 2028-2041 (2012).
3. Mafra V, *et al.* Reference genes for accurate transcript normalization in citrus genotypes under different experimental conditions. *PLoS ONE* **7**, e31263 (2012).
4. Sengoda VG, Cooper WR, Swisher KD, Henne DC, Munyaneza JE. Latent period and transmission of “*Candidatus Liberibacter solanacearum*” by the potato psyllid *Bactericera cockerelli* (Hemiptera: Trioziidae). *PLoS ONE* **9**, e93475 (2014).
5. Levy J, Ravindran A, Gross D, Tamborindeguy C, Pierson E. Translocation of ‘*Candidatus Liberibacter solanacearum*’, the Zebra chip pathogen, in potato and tomato. *Phytopathology* **101**, 1285-1291 (2011).
6. Hocquellet A, Toorawa P, Bove J-M, Garnier M. Detection and identification of the two *Candidatus Liberibacter* species associated with citrus huanglongbing by PCR amplification of ribosomal protein genes of the  $\beta$  operon. *Mol. Cell. Probe* **13**, 373-379 (1999).
7. Zheng Z, Xu M, Bao M, Wu F, Chen J, Deng X. Unusual five copies and dual forms of *nrdB* in “*Candidatus Liberibacter asiaticus*”: Biological implications and PCR detection application. *Sci. Rep.* **6**, 39020 (2016).
8. Triplett BA, Moss SC, Bland JM, Dowd MK. Induction of hairy root cultures from *Gossypium hirsutum* and *Gossypium barbadense* to produce gossypol and related compounds. *In Vitro Cell Dev. Biol. Plant.* **44**, 508-517 (2008).
