# Supplementary material for: Plant hairy roots enable high throughput identification of antimicrobials against Candidatus Liberibacter spp
Source: PubMed Central journal article supplement (PMC7669877; doi:10.1038/s41467-020-19631-x), 2020-11-16
Supplement: 41467_2020_19631_MOESM4_ESM.pdf [file 41467_2020_19631_MOESM4_ESM.pdf]

**Description of Additional Supplementary Files**

File name: Supplementary Dataset 1

Description: High throughput pre-screening of small-molecules using CLso-potato hairy roots.
